# Supplementary material for: LIGHT–HVEM signaling in keratinocytes controls development of dermatitis
Source: PubMed Central journal article supplement — J Exp Med. 2018 Feb 5;215(2):415–22. doi: 10.1084/jem.20170536 (PMC5789407; doi:10.1084/jem.20170536), 2018-02-05
Supplement: JEM_20170536_sm.pdf [file JEM_20170536_sm.pdf]

## SUPPLEMENTAL MATERIAL

Herro et al., <https://doi.org/10.1084/jem.20170536>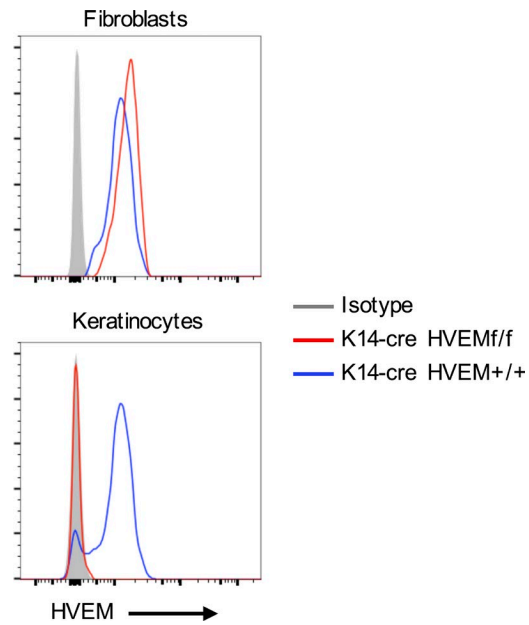

Figure S1. **HVEM expression in skin cells from K14-cre HVEM<sup>fl/fl</sup> mice.** Keratinocytes and fibroblasts from the skin were stained by flow cytometry for HVEM. The blue and red lines are K14-cre HVEM<sup>+/+</sup> and K14-cre HVEM<sup>fl/fl</sup>, respectively. Isotype control in gray.

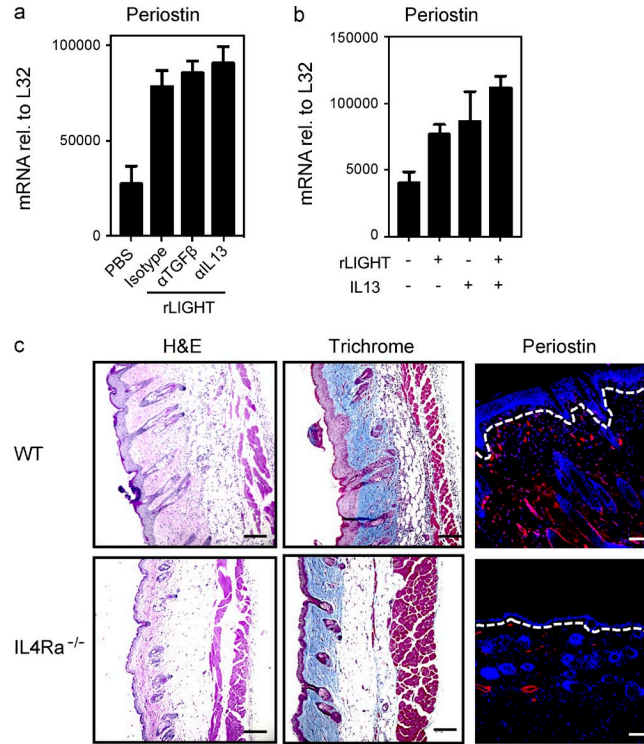

Figure S2. **LIGHT stimulates periostin expression independently of IL-13 and TGF- $\beta$ .** (a) mRNA expression of periostin in mouse keratinocytes stimulated with rLIGHT in the presence of anti-IL-13, anti-TGF- $\beta$ , or isotype control for 72 h. (b) mRNA expression of periostin in mouse keratinocytes stimulated with rLIGHT, rIL-13, or rLIGHT plus rIL-13 for 72 h. Data represent means  $\pm$  SEM from three replicate cultures and are representative of two experiments. (c) H&E, Masson's trichrome blue, and periostin stains of skin biopsy specimens of WT and IL4R $\alpha$ <sup>-/-</sup> BALB/c mice injected s.c. with rLIGHT for 2 d. Data are representative of four mice per group. Bars, 200  $\mu$ m.

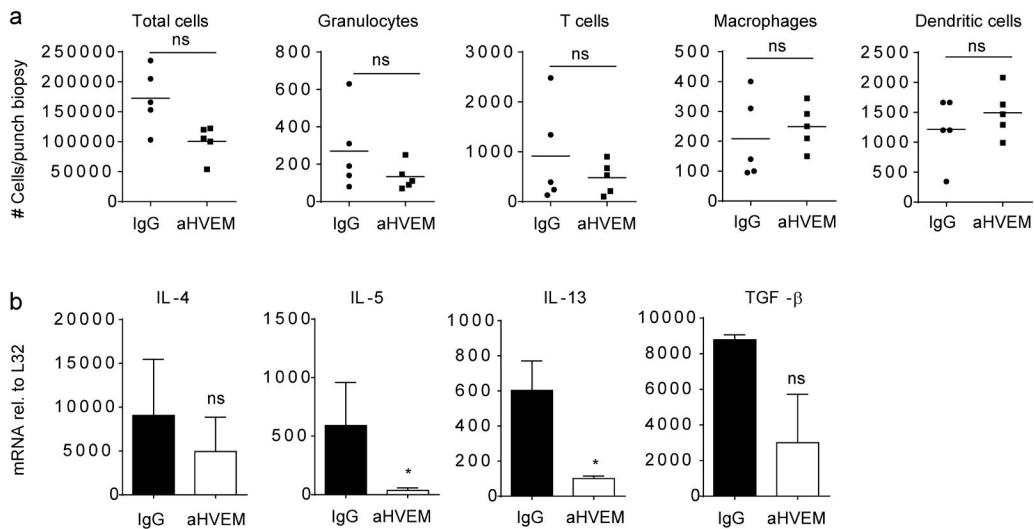

Figure S3. **WT mice were sensitized epicutaneously with HDM/SEB and treated with anti-HVEM or IgG starting on day 7 as in Fig. 4 (a-c).** (a) Quantitation of indicated cell populations in skin biopsy specimens by flow cytometry. Data are from individual mice. (b) mRNA expression of IL-4, IL-5, IL-13, and TGF- $\beta$  in skin biopsy specimens. Data represent means  $\pm$  SEM from five mice, with similar data in three experiments. \*,  $P < 0.05$ . All statistical data were generated using the Mann-Whitney test.
